# Supplementary material for: A model for presenting accelerometer paradata in large studies: ISCOLE
Source: PubMed Central journal article supplement (PMC4409714; doi:10.1186/s12966-015-0213-5), 2015-04-20
Supplement: 12966_2015_213_MOESM1_ESM.pdf [file 12966_2015_213_MOESM1_ESM.pdf]

| <b>Paradata variable</b>                 | <b>Definition</b>                                                                        | <b>Total from all sites<br/>% if applicable (denominator<br/>indicated)</b>                       | <b>Mean <math>\pm</math> SD (range) across sites<br/>% range if applicable</b>                        |
|------------------------------------------|------------------------------------------------------------------------------------------|---------------------------------------------------------------------------------------------------|-------------------------------------------------------------------------------------------------------|
| Participants consented                   | Unique participant ID numbers representing number of participants enrolled               | 7806                                                                                              | 650.5 $\pm$ 131.1 (541-991)                                                                           |
| Status                                   | Dropped/withdrawn/ineligible                                                             | 434<br>5.6% (relative to participants consented)                                                  | 36.2 $\pm$ 26.4 (7 – 78)<br>1.3 – 11.8%                                                               |
| Reasons for dropped/withdrawn/ineligible | Different reasons for ineligibility                                                      | 338 Age ineligible<br>54 Absent on day of measurement<br>37 Decided not to participate<br>5 Moved | 28.2 $\pm$ 24.6 (1 – 71)<br>4.5 $\pm$ 7.0 (0 – 21)<br>3.1 $\pm$ 4.3 (0 – 11)<br>0.4 $\pm$ 0.7 (0 – 2) |
| Eligible participants                    | 9-11 years of age and not otherwise dropped/withdrawn/ineligible                         | 7372<br>94.4% (relative to participants consented)                                                | 614.3 $\pm$ 119.1 (525 – 919)<br>88.2 – 98.7%                                                         |
| Accelerometers used                      | Unique accelerometer ID numbers representing number of instruments used during the study | 926                                                                                               | 77.2 $\pm$ 13.6 (69 – 118)                                                                            |
| Accelerometer capacity                   | Mean number of participants assessed per accelerometer                                   | N/A                                                                                               | 8.0* (5.6 – 13.6)                                                                                     |

|                            |                                            |                                                                                                         |                                                     |
|----------------------------|--------------------------------------------|---------------------------------------------------------------------------------------------------------|-----------------------------------------------------|
| Accelerometers distributed | Accelerometers distributed to participants | Initial monitoring: 7314<br>99.2% (relative to eligible participants)                                   | 609.5 ± 119.8 (525 – 914)<br>93.2 – 100.0%          |
|                            |                                            | Additional monitoring: 106<br>1.4% (relative to accelerometers distributed for initial monitoring)      | 8.8 ± 10.2 (0 – 26)<br>0 – 4.5%                     |
| Accelerometers retrieved   | Accelerometers retrieved from participants | Initial monitoring: 7285<br>99.6% (relative to accelerometers distributed for initial monitoring)       | 607.1 ± 119.8 (524 – 914)<br>97.1 – 100.0%          |
|                            |                                            | Additional monitoring: 106<br>100.0% (relative to accelerometers distributed for additional monitoring) | 100.0% at all sites doing any additional monitoring |
| Accelerometers lost        | Accelerometers not returned by participant | 29<br>0.4% (relative to accelerometers distributed for initial and additional monitoring)               | 2.4 ± 5.3 (0 – 19)<br>0 – 2.9%                      |
|                            |                                            | 3.1% (relative to accelerometers used)                                                                  | 0 – 16.1%                                           |

|                                                                 |                                                                                                                                                                                                  |                                                                                                                                                                                                                                                                                                                                                                                        |                                                                                                                                                                                                                                                                                              |
|-----------------------------------------------------------------|--------------------------------------------------------------------------------------------------------------------------------------------------------------------------------------------------|----------------------------------------------------------------------------------------------------------------------------------------------------------------------------------------------------------------------------------------------------------------------------------------------------------------------------------------------------------------------------------------|----------------------------------------------------------------------------------------------------------------------------------------------------------------------------------------------------------------------------------------------------------------------------------------------|
| Participants with reported adequate data                        | Participants with reported adequate data (at least 4 days of data with $\geq$ 10 hours of wear time, including 1 weekend day) as evaluated by ActiLife software                                  | <p>Initial monitoring: 6914<br/>94.5% (relative to accelerometers distributed for initial monitoring)</p> <p>Additional monitoring: 92<br/>86.8% (relative to accelerometers distributed for additional monitoring)</p>                                                                                                                                                                | <p>576.2 <math>\pm</math> 113.9 (494 – 884)<br/>83.2 – 98.6%</p> <p>11.5 <math>\pm</math> 9.0 (1 – 25)<br/>50.0 – 100.0%</p>                                                                                                                                                                 |
| Participants with reported inadequate data                      | Participants with reported inadequate data (< 4 days of data with $\geq$ 10 hours of wear time and/or lacking a weekend day with $\geq$ 10 hours of wear time) as evaluated by ActiLife software | <p>Initial monitoring: 400<br/>5.5% (relative to accelerometers distributed for initial monitoring)</p> <p>Additional monitoring: 14<br/>13.2% (relative to accelerometers distributed for additional monitoring)</p>                                                                                                                                                                  | <p>33.3 <math>\pm</math> 28.0 (8 – 109)<br/>1.4 – 16.8%</p> <p>1.8 <math>\pm</math> 2.6 (0 – 8)<br/>0 – 50.0%</p>                                                                                                                                                                            |
| Reasons for inadequate data                                     | Reported reasons why adequate data is not present                                                                                                                                                | <p>Initial monitoring:</p> <ul style="list-style-type: none"> <li>329 Insufficient wear time</li> <li>29 Accelerometer lost</li> <li>24 Accelerometer malfunction</li> <li>1 Refused to wear accelerometer</li> <li>17 Other</li> </ul> <p>Additional monitoring:</p> <ul style="list-style-type: none"> <li>13 Insufficient wear time</li> <li>1 Accelerometer malfunction</li> </ul> | <p>27.4 <math>\pm</math> 23.3 (5 – 86)</p> <p>2.4 <math>\pm</math> 5.3 (0 – 19)</p> <p>2.0 <math>\pm</math> 2.0 (0 – 6)</p> <p>0.1 <math>\pm</math> 0.3 (0 – 1)</p> <p>1.4 <math>\pm</math> 4.1 (0 – 14)</p> <p>1.6 <math>\pm</math> 2.3 (0 – 7)</p> <p>0.1 <math>\pm</math> 0.4 (0 – 1)</p> |
| Participants with objectively determined valid waking wear time | After accounting for total sleep episode time and waking wear time, participants with $\geq$ 4 days with $\geq$ 10 hours of waking wear time, including 1 weekend day                            | <p>6553<br/>90.0% (relative to participants who completed monitoring)</p>                                                                                                                                                                                                                                                                                                              | <p>546.1 <math>\pm</math> 113.5 (468 – 857)<br/>75.8 – 94.6%</p>                                                                                                                                                                                                                             |

|                                                                         |                                                                                                                                                                |                                                                   |                                                                                           |
|-------------------------------------------------------------------------|----------------------------------------------------------------------------------------------------------------------------------------------------------------|-------------------------------------------------------------------|-------------------------------------------------------------------------------------------|
| Valid days                                                              | Mean number of days with $\geq 10$ hours of waking wear time from participants with valid waking wear time                                                     | N/A                                                               | $6.5 \pm 0.7$ (5.8 – 6.9)<br>92.9 % (82.6-98.0%) relative to 7 possible days              |
| 24-hr wear time                                                         | Mean minutes of wear time over 24-hr period per valid day for participants with objectively determined valid waking wear time                                  | N/A                                                               | $1366.8 \pm 106.6$ (1315.3 – 1386.5)                                                      |
| Waking wear                                                             | Mean minutes of wear time considering only waking hours per valid day for participants with objectively determined valid waking wear time                      | N/A                                                               | $888.4 \pm 52.6$ (844.7 – 910.1)                                                          |
| Participants with objectively determined valid total sleep episode time | After accounting for total sleep episode time, participants with $\geq 3$ nights with $\geq 160$ mins of total sleep episode time, including one weekend night | 6318<br>86.7% (relative to participants who completed monitoring) | $526.5 \pm 114.8$ (425 – 843)<br>76.1 – 92.2%                                             |
| Valid nights                                                            | Mean number of nights with $\geq 160$ mins of total sleep episode time from participants with valid total sleep episode time                                   | N/A                                                               | $5.5 \pm 0.8$ (4.8 – 5.8)                                                                 |
| Total sleep episode time                                                | Mean total minutes from all nocturnal sleep episodes identified by applied algorithm <sup>3</sup>                                                              | N/A                                                               | $529.0 \pm 53.7$ (496.2 – 569.4)                                                          |
| Implausibly high activity count values                                  | Minutes and unique participants with values $\geq 20,000$ activity counts/minute                                                                               | 4762 minutes from 695 unique participants                         | $396.8 \pm 505.6$ minutes (16 – 1427) from $57.9 \pm 45.0$ unique participants (12 – 144) |

\* Calculated value, no SD
